# Supplementary material for: Promoting physical activity in regional and remote cancer survivors (PPARCS) using wearables and health coaching: randomised controlled trial protocol
Source: PubMed Central journal article supplement — BMJ Open. 2019 May 24;9(5):e028369. doi: 10.1136/bmjopen-2018-028369 (PMC6538194; doi:10.1136/bmjopen-2018-028369), 2019-05-24
Supplement: bmjopen-2018-028369supp001.pdf [file bmjopen-2018-028369supp001.pdf]

**Supplementary File, Appendix A: Consent form**

|                        |                                                                                                                                                                             |
|------------------------|-----------------------------------------------------------------------------------------------------------------------------------------------------------------------------|
| Title                  | <b>The promotion of physical activity to adult cancer survivors in regional and remote areas of Western Australia using Fitbit technology and telephone health coaching</b> |
| Principal investigator | <b>Sarah Hardcastle</b>                                                                                                                                                     |

Note: All parties signing the consent section must date their own signature.

**Declaration by participant**

- I have read, or have had read to me, and I understand the participant information and consent form.
- I have had an opportunity to ask questions and I am satisfied with the answers I have received.
- I understand the purposes, procedures and risks of the research described in this research study.
- I intend to adhere to the study requirements to the best of my ability.
- I understand that I will be given a signed copy of this document to keep.

Signature \_\_\_\_\_ Date \_\_\_\_\_

Name of participant (please print) \_\_\_\_\_

**Declaration by trial doctor/senior researcher<sup>†</sup>**

I have given a verbal explanation of this study, its procedures and risks and I believe that the participant has understood that explanation.

Signature \_\_\_\_\_ Date \_\_\_\_\_

Name of trial doctor/ researcher<sup>†</sup> (please print) \_\_\_\_\_

---

<sup>†</sup> A senior member of the research team must provide the explanation of, and information concerning, the research study.
